1 ***Arabidopsis thaliana* induces multigenerational stress tolerance against biotic and**  
2 **abiotic stressors and memorization of host colonization in *Bacillus subtilis*.**

3 Omri Gilhar<sup>1,2</sup>, Tsviya Olender<sup>1</sup>, Asaph Aharoni<sup>2</sup>, Jonathan Friedman<sup>3</sup>, and Ilana Kolodkin-Gal<sup>1,3</sup>

4 <sup>1</sup>Department of Molecular Genetics, Weizmann Institute of Science, Rehovot, Israel

5 <sup>2</sup>Department of Plant and Environmental Sciences, Weizmann Institute of Science, Rehovot, Israel

6 <sup>3</sup> Department of Plant Pathology and Microbiology, The Robert H. Smith Faculty of Agriculture, Food and  
7 Environment, The Hebrew University of Jerusalem, Rehovot, 7610001, Israel;

8

9

10 **Abstract**

11 *Bacillus subtilis* is a beneficial bacterium that supports plant growth and protects it from bacterial,  
12 fungal, and viral infections. Here using a simplified system of *B. subtilis*, and *Arabidopsis thaliana*  
13 interactions, we found that history-dependent behavior is a potentially important manifestation  
14 of host colonization, worth classifying and quantifying. To study history-dependent adaptation  
15 to plant hosts, we develop a simple framework for measuring the physiological memory of *B.*  
16 *subtilis* following its interaction with *Arabidopsis thaliana*. We found that *A. thaliana* secretions  
17 reduce the lag time in pre-exposed bacteria compared with naïve *B. subtilis* cells, even after their  
18 complete removal. Pre-exposed *B. subtilis* cells colonized plant roots more efficiently than naïve  
19 bacteria, and were more resistant to biotic and abiotic stressors such as salicylic acid, and high  
20 salinity. Descendants of bacteria treated with plant secretions had an advantage in the  
21 competition against unexposed bacteria for root colonization. The effect of plant secretions was  
22 independent of their roles as nitrogen and carbon sources. Transcriptome analysis of both  
23 ancestors and descendants revealed that a specific set of plant-induced processes, among them c-  
24 di-AMP homeostasis, and the general stress response, maintain the signature of association with  
25 the plant in descendants of pre-exposed bacteria. Consistently, plant secretions compensated for  
26 the loss of c-di-AMP cyclases but required the general stress response and the master regulator  
27 Spo0A to exert their short and long-term effects.

28 Overall, our work demonstrates that bacterial memory manifested by multigenerational  
29 reversible adaptation to plant hosts confirms an advantage to symbiotic bacteria during  
30 competition.

31

## 32 **Introduction**

33 *Bacillus subtilis* and related *Bacillus* species, such as *B. amyloliquefaciens*, *B. velezensis* and *B. mojavensis*,  
34 serve as biocontrol agents, plant and mammalian probiotics<sup>1-3</sup>. Beneficial *Bacillus* species protect  
35 their hosts from both fungal and bacterial pathogens<sup>4-6</sup>, a protection that is mediated, in part, by  
36 the formation of biofilms<sup>7,8</sup>, as well as by the production of a wide range of antibiotics<sup>2,9</sup>. *B.*  
37 *subtilis* also elicits induced systemic resistance (ISR) in plant hosts via its secondary metabolites  
38<sup>10-12</sup>. The successful colonization of plant hosts depends on the capacity of *B. subtilis* to form  
39 biofilms and occurs at preferred sites of root exudation, where plants release C- and N-  
40 containing compounds into the surrounding soil<sup>13</sup>. Plant metabolites were shown to induce  
41 motility, chemotaxis, matrix production and antibiotic production<sup>11,14-17</sup>. The plant can also  
42 induce long-term adaptations: Bacteria that were repeatedly cultured with *A. thaliana* evolved  
43 rapidly, to generate morphotypes with improved root colonization. In this experimental system,  
44 *Bacillus subtilis* cells diversified into three distinct morphotypes altered in their growth and pellicle  
45 formation in a medium supplemented with plant polysaccharides<sup>18</sup>.

46 Plant polysaccharides serve as a signal for biofilm formation transduced by activating kinases  
47 controlling the phosphorylation state of the master regulator Spo0A<sup>15</sup>, which directly or  
48 indirectly controls the expression of some 500 genes in *B. subtilis*<sup>19,20</sup>. In part, Spo0A regulates  
49 the generation of spores, a dormant and resilient cell type. However, sporulation is considered a  
50 last resort to cope with extreme environments, as well as biotic and abiotic stressors<sup>21</sup>.

51 One effective strategy for tackling stressors can be the utilization of information collected during  
52 a previous interaction with similar stress. Although it was shown that bacterial behavior could be  
53 modified to reflect preceding events, the time elapsed between the events usually is very short,  
54 counting in seconds or minutes, and, as such, may not be classified as a “true memory”<sup>22</sup>.  
55 Mechanistically, multigenerational responses operate through the transmission of cytoplasmic  
56 proteins with lifetimes more extended than the generation of a bacterial cell. For example, the  
57 stability of proteins encoded by the lactose operon in *E. coli* reduced the bacterial lag phase  
58 during growth in media in which the concentrations of glucose and lactose fluctuated<sup>23</sup>. In  
59 addition, a recent study in *P. aeruginosa* reported multigenerational memory based on nucleotide  
60 signaling related to abiotic surfaces. In this study, the bacteria formed a cyclic-AMP–TFP-based

61 memory of surface attachment that enabled them and their descendants an improved re-  
62 attachment<sup>24</sup>.

63 Plants (representing biotic hosts and their surfaces) were reported to induce long-term  
64 adaptations in bacteria through a genetic selection of distinct morphotypes: *B. subtilis* repeatedly  
65 cultured with *A. thaliana* evolved rapidly to generate morphotypes with improved root  
66 colonization. In this experimental system, the bacterial cells diversified into three distinct  
67 morphotypes altered in their growth and pellicle formation in a medium supplemented with  
68 plant polysaccharides<sup>25</sup> (Blake et al., 2021). Whether symbiosis or interaction with biotic surfaces  
69 induces more transient multigenerational responses and whether these long-term adaptations  
70 provide quantifiable fitness advantage remain unknown.

71 Given the potential ubiquity and significance of long-term adaptation to the host, quantifying  
72 the long-term effects of *B. subtilis* interactions with the host could be an important piece of the  
73 puzzle of bacterial regulation, survival strategy, and evolution. To this end, we developed a  
74 simple framework for measuring the persistence of memory in ancestors and descendants that  
75 were exposed to plant secretions, and the amount of information that was maintained in their  
76 transcriptome regarding this interaction. Relying on it, we unraveled several new principles  
77 shaping long-term effects of the plant on *B. subtilis* beneficial bacterial communities. First, we  
78 found that symbiosis is manifested by a long-term transient adaptation of root-associated  
79 bacteria to their host, which is not due to host-driven genetic selection. These long-term  
80 adaptations decrease the duration of the lag phase for exposed bacteria and their descendants  
81 and promote more efficient root colonization. In turn, the optimization of plant colonization  
82 promotes the plant growth mediated by the exposed bacteria, compared with naïve bacteria that  
83 never interacted with a host. These symbiotic features were pronounced under abiotic stress.  
84 Second, we determined that while a global response to the plant involves 25% of the  
85 transcriptome, a much smaller core of genes, primarily associated with the general stress  
86 response and antibiotic production maintain their expression pattern in free-living descendants  
87 of plant-associated bacteria. Finally, we determined that the plant signaling acts upstream of the  
88 nucleotide signaling of c-di-AMP.

89 Our results indicate that there might be a strong fitness incentive toward memory in *B. subtilis*. If  
90 cells could use a memory of their previous interactions with the plant to ‘predict’ future

91 interactions with plant hosts, they might improve their odds for long-term survival in the natural  
92 habitat of *B. subtilis*, the rhizosphere.

93

94

## 95 **Results**

### 96 **Treatment with *A. thaliana* secretions shortens the lag phase of bacteria and their** 97 **descendants**

98 To assess whether the effect of the plant on bacterial growth is maintained after detachment of  
99 plant colonizers from the plant, we monitored the growth of bacteria that were cultured with or  
100 without plant secretions in a fresh medium (Fig. 1A). As root secretions were removed prior to  
101 culturing, this system was designed to measure short and long-term adaptation to the plant. We  
102 found that pre-treatment with plant secretions affected bacterial growth, and specifically, the lag  
103 phase was shortened by previous interactions with plant secretions (Fig. 1B). However, the  
104 growth rate and the maximal OD of the bacteria were not significantly altered by previous  
105 exposure to plant secretions (Fig. S1). Neither pre-treatment with a carbon source (e.g. glucose  
106 of sucrose), nor with a nitrogen source (e.g. glutamate and ammonium chloride) affected the lag  
107 phase comparably to plant secretions (Fig. S2)

108 To test whether plant secretions promote growth under abiotic stress, we examined whether a  
109 more pronounced decrease in lag time is observed under high salinity, one of the most common  
110 stressors in the soil and rhizosphere <sup>26</sup>. The decrease in lag time upon secretion treatment was  
111 larger in the presence of NaCl than in its absence (29 percent difference) (Fig.1B). The beneficial  
112 effect of pre-exposure to the plant growth was multigenerational- descendants of bacteria treated  
113 with secretions grown for 8 generations in rich media exhibited a significantly shortened lag  
114 phase compared with descendants of unexposed bacteria (Fig. 1C). However, growing the  
115 bacteria for additional 16 generations resulted in the loss of the shortened lag phase in the  
116 descendants of the secretion-treated bacteria (Fig. S3). Here again, neither carbon nor nitrogen  
117 was sufficient to mimic the beneficial effects of plant secretions to the descendants (Fig. S4).

118 We then asked whether enhanced growth and stress resistance result from a plant-induced  
119 selection. The descendants of secretion treated and untreated bacteria were isolated from single  
120 colonies on LB agar, and single isolates were compared for growth. Re-isolated cells from

121 treated and non-treated cultures exhibited a similar growth and a comparable lag time (Figs 1D  
122 and S5) to their parental strain. Therefore, the decreased lag time of the bacteria in this system  
123 most likely reflects a temporary adaptation to the secretions and does not result from a  
124 hereditary change.

125 To determine whether common stressors other than NaCl induce a more pronounced lag time  
126 decrease in secretion-treated bacteria as compared with untreated bacteria, we used high  
127 concentrations of salicylic acid, a phytohormone playing an important role in plant protection.  
128 The decrease in lag time upon secretion treatment was larger in the presence of salicylic acid  
129 than in its absence (32 percent difference) (Fig. 1E).

130

### 131 **Memorization of root secretions increases the competitiveness of *B. subtilis* during root** 132 **colonization**

133 In the rhizosphere, detachment from the plant is quite common, and the detached bacteria often  
134 compete with other rhizosphere free-living members for colonization of an alternate host<sup>27</sup>. We  
135 therefore examined the effect of pre-treatment with secretions on root colonization. The  
136 bacteria treated with secretions colonized the root more efficiently than untreated bacteria (Fig.  
137 2A). Furthermore, the descendants of secretion-treated bacteria more efficiently colonized the  
138 root in high salinity (Fig. 2B).

139 To test whether plant secretions grant the bacteria an advantage during competition with naïve  
140 bacteria, we competed naïve bacteria with bacteria exposed to root secretions for root  
141 colonization. Fluorescently labeled bacteria were cultured in the absence (mKate-labeled) or  
142 presence of plant secretions (GFP-labeled) and then co-inoculated with *A. thaliana* seedlings. As  
143 shown, the bacteria pre-treated with secretions colonized the root in significantly more  
144 efficiently than untreated bacteria in the absence and presence of NaCl (Figs 2A-C). The bias  
145 was not due to the different fluorophores used for tagging as naïve bacteria labeled with GFP  
146 and mKate colonized the plant similarly (Fig. S6). Pre-treatment with *A. thaliana* secretions also  
147 induced a more efficient colonization of tomato seedlings similarly to *A. thaliana* (Figs 2D and  
148 S7). These results indicate that association with a plant allows exposed bacteria and their  
149 descendants to colonize a new plant host more efficiently, which differ from the original host

150 that produced the secretions. This effect was also multigenerational as descendants of the treated  
151 and untreated bacteria exhibited a similar ratio of root colonization as their ancestors (Fig. 2E).

152

### 153 **Transcriptome profiling reveals a specific set of genes reflecting the multigenerational** 154 **adaptation of *B. subtilis* to its host**

155 To assess the molecular features of temporal and multigenerational adaptation to the root, we  
156 compared the transcriptome of untreated *B. subtilis* cells and cells cultured in plant secretions. *B.*  
157 *subtilis* cells were also cultured in the presence of plant, to examine whether physical association  
158 with the root further alters gene expression.

159 The transcriptome of secretion treatment was similar to bacteria physically associated with the  
160 root, indicating that the majority of host-driven gene regulation is due to the exchange of  
161 secreted compounds. The number of genes differentially expressed following secretion  
162 treatment versus untreated bacteria was 1292, while 1578 genes were differentially expressed  
163 following treatment with the plant versus untreated bacteria (Fig. 3A-D, Fig S6). Although the  
164 transcriptome architecture of bacteria that physically interact with the plant and bacteria treated  
165 with plant secretions alone were similar, with a significant overlap ( $p < 1.82E-135$ , Fig. 3B),  
166 there was still a differential expression of 508 genes related to processes such as carbon and  
167 amino acid homeostasis, c-di-AMP signaling and stress response (Fig. S7).

168 Pathway analysis indicated that the physical association with the root as well as exposure to  
169 secretions altered the expression of genes related to bacterial life style such as motility and  
170 antibiotic production (chance for false analysis=  $2.94E-06$  and  $2.31E-03$  respectively) (Fig. 3E).  
171 In addition, amino acid homeostasis and iron homeostasis were altered (chance for false analysis  
172 =  $5.80E-04$  and  $0.03$  respectively). These metabolic alterations could indicate co-feeding  
173 relationships between *A. thaliana* and *B. subtilis*. Lastly, we examined the differential expression  
174 of genes related to c-di-AMP homeostasis, stress tolerance, biofilm formation and carbon  
175 metabolism. Indeed, we observed that interaction with plant secretions induced predominantly  
176 upregulation of genes involved in biofilm formation (23 upregulated and 7 downregulated out of  
177 60 genes), stress response (70 upregulated and 13 downregulated out of 200 genes) and carbon  
178 metabolism (51 upregulated and 16 downregulated out of 216 genes). Genes affected by c-di-  
179 AMP signaling were both up and down regulated (62 upregulated and 60 downregulated out of

180 443) (Fig. 3F). Notably, our previous results using flow cytometry confirm the induction of the  
181 biosynthetic clusters for the antibiotics surfactin and bacillaene by the root, as well as the  
182 repression of lactate dehydrogenase<sup>28</sup>.

183 The alteration of the transcriptome architecture upon exposure to the secretions was  
184 widespread. However, the changes in the transcriptome of descendants of pre-exposed bacteria  
185 compared with the transcriptome of non-treated bacteria were much more specific (Fig. 3F).  
186 Plant-driven induction of metabolic, iron homeostasis biofilm and motility genes were not  
187 conserved in descendants (Figs 3E and F). In contrast, host-driven induction of 278 genes was  
188 clearly observed in the descendants of treated bacteria (Fig. 3F). These were comprised mostly  
189 of genes involved in stress response (89 upregulated) and genes affected by c-di-AMP signaling  
190 (15 upregulated and 21 downregulated). Interestingly, 18 genes involved in motility were  
191 downregulated in descendant bacteria, unlike ancestor bacteria in which the motility genes were  
192 predominantly upregulated (21 upregulated and 5 downregulated out of 42 genes). Overall, these  
193 results indicate that specific genes related to stress tolerance are induced in plant-associated  
194 bacteria, as well as their descendants (Fig. 3F), and could account for both increased  
195 colonization of a new host and resistance to abiotic stress. Furthermore, our results indicate that  
196 a specific transcriptional signature reflecting a multigenerational effect of the plant host, and that  
197 this response includes relaxed response of the stress response clusters in the descendants of the  
198 pre-exposed bacteria compared with their ancestor

199

200 **Microbial multigenerational response involved cyclic di-AMP signaling, the general**  
201 **stress response and the master regulator Spo0A.**

202 Cyclic di-AMP is a signaling dinucleotide used for bacterial intracellular signaling. In Gram-  
203 positive bacteria, it affects growth, sporulation, virulence, DNA damage-repair, osmoregulation  
204 <sup>29</sup> and biofilm formation<sup>30</sup>. Di-Adenylate cyclases (DACs) convert pairs of ATP molecules into  
205 c-di-AMP. In parallel, enzymes degrading c-di-AMP play a role in the homeostasis of this  
206 second messenger. These two events lead to changes in the c-di-AMP cellular pool, which in  
207 turn modifies the activities of target proteins <sup>31-33</sup>. In *B. subtilis*, the enzymes that produce c-di-  
208 AMP are designated DisA, CdaA and CdaS, with DisA being a cardinal sensor of DNA damage  
209 to activate the general stress response<sup>33,34</sup>. CdaA has a constitutive expression and is localized to

210 the cell membrane, and its paralog CdaS synthesizes c-di-AMP during spore formation,  
211 expressed only during sporulation and is localized to the forespore<sup>35</sup>. *B. subtilis* also secretes c-di-  
212 AMP, which can act as an extracellular signal to affect biofilm formation and plant attachment<sup>30</sup>.  
213 Whether symbiosis also induces more transient multigenerational responses, and whether c-di-  
214 AMP plays a role in such long-term adaptations remains unknown. However, c-AMP was shown  
215 to mediate multigenerational memory of artificial surfaces in the pathogen *P. aeruginosa*, linking  
216 nucleotide signaling with microbial memory<sup>24</sup>.

217 We therefore tested the role of the diadenylate cyclases in the adaptation of *B. subtilis* to the  
218 plant. The parental strain and its diadenylate cyclase mutants ( $\Delta disA$ ,  $\Delta cdaA$  and  $\Delta cdaS$ ) were  
219 cultured with and without secretions. Interestingly,  $\Delta cdaA$  exhibited a significantly longer lag  
220 time and a decreased root colonization as compared to the WT in the absence of secretions ( $p <$   
221  $0.05$ ), but following treatment with secretions, the lag time (Fig. 5A) was comparable to the  
222 parental strain ( $p = 0.25$ ). The lag time decrease of  $\Delta cdaS$  following secretion treatment was not  
223 significantly different from the WT in ancestors ( $p = 0.75$ ) and descendants ( $p = 0.53$ ) (Figs. 5A  
224 and B). This result indicates that root secretions compensate for the growth defects in the  
225 diadenylate cyclase mutant  $\Delta cdaA$ . Consistent with the multigenerational effect on the  
226 transcription of genes related to c-di-AMP homeostasis, the effect was conserved in descendants  
227 of pre-treated bacteria (Fig. 5B). These results indicate that the plant secretions can compensate  
228 over the loss of diadenylate cyclase in the bacteria exposed to secretions, as well as in their  
229 descendants.

230 The plant could directly provide c-di-AMP or alternatively, plant secretions may modulate the  
231 intracellular levels of c-di-AMP. Exogenously applied c-di-AMP did not mimic the effect of  
232 plant secretions, as the growth curves of the treated bacteria overlapped those of untreated  
233 bacteria (Fig. S9), raising the hypothesis that the plant may modulate the intracellular levels of c-  
234 di-AMP indirectly. In agreement with this hypothesis, the expression of the genes encoding the  
235 diadenylate cyclase DisA and the c-di-AMP transporter YhcA was induced by pre-exposure to  
236 root secretions, and *cdaS* was elevated in their descendants (supporting data sheet 1). These  
237 results are consistent with the capacity of the plant to compensate over the loss of the adenylate  
238 cyclase CdaA. In addition, we observed a differential expression of genes that are involved in  
239 potassium homeostasis, and thereby to osmotic stress tolerance such as *kimA*, encoding a  
240 potassium transporter, *yjbQ* potassium exporter and *kbtT*, a  $K^+/H^+$  antiporter<sup>36</sup>, whose



241 activities is also modulated by direct c-di-AMP binding<sup>37</sup> (Fig. S10). These results raise the  
242 hypothesis that plant alters c-di-AMP levels and thereby induces a long-term general stress  
243 response.

244 The stress response in *B. subtilis* can be activated by the general stress response regulators  
245 (primarily the alternative sigma factor SigB<sup>38</sup>) and the master regulator Spo0A<sup>39</sup>, both acting  
246 downstream to c-di-AMP signaling<sup>30</sup>. Some of the target genes of SigB overlap with the target  
247 genes of PerR, a dimeric repressor that regulates the response to peroxide stress, and thereby  
248 PerR regulon is overlapping at some extent with SigB regulon<sup>40</sup>. Therefore, we evaluated the  
249 major regulators of stress tolerance by evaluating the response of their, deletion mutants to plant  
250 secretions. We first evaluated the requirements for Spo0A, as a major regulator of plant  
251 colonization<sup>14</sup>. Root secretions reduced the lag time of a mutant lacking Spo0A to a smaller  
252 extent compared with the WT parental strain, both in the absence and presence of NaCl, while  
253 their descendants exhibited a slight increase in lag time (e.g. an opposite response to the plant)  
254 following secretion treatment in the presence and absence of salt (Figs 5C-D). As Spo0A  
255 deletion did not eliminate the beneficial effects of plant secretions, we tested the general stress  
256 response main components: Secretion-treated  $\Delta sigB$  strain was comparable to WT in the absence  
257 and presence of NaCl, while  $\Delta perR$  was largely resistant to root secretions compared with the  
258 parental strain, and a *sigB* mutant (Figs 5E and G). These results indicate that plant secretions  
259 exert their specific early effects primarily through PerR. In contrast to the presence of significant  
260 response of ancestors lacking the *sigB* to secretions, decedents of the mutant did not show an  
261 increased tolerance to stress in response to secretions. Plant secretions increased (rather than  
262 decreased) the lag time of *sigB* mutant descendants of treated bacteria, indicating that SigB  
263 absence does not allow plant secretions to convey late beneficial effects in the exposed bacteria  
264 (Fig. 5F). Similarly, in contrast to the lack of response of ancestors lacking PerR, in the  
265 descendants, *perR* mutant exhibited a pronounced reaction to secretions than WT in the absence  
266 and presence of NaCl, indicating that PerR participates in sensing early but not late effects of  
267 plant secretions (Fig. 5H).

268 Overall, these results indicate that root secretions trigger the *B. subtilis* stress response and  
269 require PerR/SigB and Spo0A, supporting the differential expression of their regulons.

270

271 ***A. thaliana* secondary metabolites can exert beneficial multigenerational response for *B.***  
272 ***subtilis***

273 To identify the plant compound(s) responsible for the phenotype we observe in the bacteria  
274 following secretion treatment, we used the parental strain bearing  $P_{pksC}$  fused to a luciferase  
275 reporter. The choice of this reporter resulted from our finding that *pks* operon genes were  
276 significantly upregulated in secretion-treated bacteria and their descendants (Fig. S11). These  
277 results are consistent with our previous findings that *A. thaliana* and *Eruca sativa* induce *pks*  
278 expression<sup>41,42</sup>.

279 We first monitored the planktonic growth and *pks* promoter expression in the presence of  
280 several plant metabolites that modulate plant-bacteria interaction, i.e., salicylic acid, which  
281 induces the SigB-dependent general stress response in *B. subtilis*<sup>43</sup> and jasmonic acid, whose  
282 derivative methyl jasmonate affected the rhizosphere community of *A. thaliana*<sup>44</sup>. We also tested  
283 again sucrose, which promotes *B. subtilis* plant colonization<sup>15</sup>, and malic acid, a plant derived  
284 preferred carbon sources for *B. subtilis*<sup>45</sup>. None of those mentioned above compounds  
285 mimicked the effect of plant secretions on *pks* promoter expression (Fig. S12).

286 Finally, we screened secretions from *A. thaliana* strains with an aberrant accumulation of various  
287 secondary metabolites for both plant-derived benefits, which are sustained over time: the  
288 induction of the bacterial *pks* promoter and shortening of the lag phase. We screened mutants in  
289 genes coding for enzymes in the methylerythritol phosphate (MEP) pathway, i.e., DXR and  
290 DXS. This pathway produces isoprenoids metabolites with essential functions in plants and  
291 bacteria<sup>46,47</sup>. We also examined secretions from an *Arabidopsis aberrant lateral root formation 4 (alf4)*  
292 mutant that has an aberrant auxin signaling<sup>48</sup> and a mutant deficient in one of the lipoxygenases  
293 (LOXs), which are involved in the biosynthesis of a large group of biologically active fatty acid  
294 metabolites collectively named oxylipins<sup>49</sup>.

295 We found that secretions from a DXS overexpressing strain (*dxs* OE) upregulated the  
296 expression of the *pks* promoter to a similar extent as WT secretions. However, secretions a  
297 DXS-deficient strain (*dxs1*), failed to replicate the effect of WT secretions on *pks* expression  
298 (Fig. 6A-C). Furthermore, secretions from all but a single mutant strain (*lox2-1*) yielded a milder  
299 impact on the bacterial lag phase than WT secretions (Fig. 6D-F).

300 These results support a possible role of plant isoprenoid and oxylipin biosynthesis and auxin  
301 signaling in modulating the bacterial lag phase and *pks* expression. These pathways could have a  
302 complementary function in inducing the bacterial phenotype we observe following interaction  
303 with the plant.

304

## 305 **Discussion**

306 *B. subtilis* is a promising sustainable alternative to traditionally used hazardous pesticides, as it can  
307 protect crops from fungal, bacterial, and viral pathogens, without harming the diversity of their  
308 environment to the same extent. The beneficial properties of this bacterium and related species  
309 are attributed to the production of a wide arsenal of antibiotics and antimicrobial substances  
310 with a broad repertoire<sup>50</sup>. Currently, while biocontrol agents belonging to the *B. subtilis* clade  
311 carry tremendous potential for agriculture the results in the field often fail to compare with  
312 chemical pesticides<sup>51</sup>. Therefore, to successfully apply strains of *B. subtilis* and related species  
313 in agriculture, the resolution of the underlying mechanisms of how it interacts with and  
314 colonizes plants is extremely useful.

315 Under standard laboratory settings, several cues have been associated with biofilm maturation  
316 and assembly, including oxygen deprivation<sup>52</sup>, nutrient deprivation<sup>53-55</sup>, small molecule sensing  
317<sup>30,56,57</sup>, calcium<sup>58,59</sup> and physical cues<sup>60-63</sup>. In addition, it was shown that plant polysaccharides,  
318 and malic acid may act as signals to induce biofilm formation<sup>15,64</sup> that plant secretions can  
319 enhance chemotaxis<sup>16</sup>, and that sucrose from the plant can alter gene expression to promote  
320 root colonization<sup>17</sup>.

321 It is interesting to inquire whether adaptation to the plant can also be manifested by long-term  
322 memory. In recent years, evidence emerged that bacteria contain complex control circuitry  
323 capable of generating multi-stable behaviors and other complex dynamics that have been  
324 conceptually linked to memory in other systems<sup>65</sup>. It has long been known that bacterial cells  
325 that have experienced different environmental histories may respond differently to current  
326 conditions<sup>66</sup>. In addition, genetic diversification of *B. subtilis* into morphotypes also plays an  
327 important role in evolution during plant root colonization<sup>25</sup>. Considering the complex nature of  
328 plant-bacillus interactions, history-dependent behavioral differences may be physically necessary

329 consequences of the prior interaction, as they may stabilize symbiosis by providing ongoing  
330 benefits to the interacting bacteria.

331 Here, we could demonstrate such multigenerational effect from interaction with the host: First,  
332 bacteria pre-exposed to plant secretions and their descendants (grown for 8 generations in a rich  
333 media) exhibited and improved growth and enhanced stress tolerance to both salinity stress and  
334 high concentrations of the plant phytohormone salicylic acid. Second, and potentially due to this  
335 increased fitness, the exposure to the plant root increased the capacity of the ancestors and  
336 descendants to colonize the plant efficiently. Overall, this enhanced fitness was robustly  
337 manifested by the capacity of pre-exposed bacteria and their descendants to compete with naïve  
338 bacteria for the colonization of a new root.

339 Transcriptome analysis to an exhaustive set of culturing experiments on *B. subtilis* demonstrated  
340 that *B. subtilis* experience short term and long term changes in gene expression following its  
341 exposure. More short term than long-term memory was evident in response to the plant (Fig. 4).  
342 However, 278 genes were still differentially expressed in the descendants of pre-exposed  
343 bacteria, and many of them belonged to either the general stress response, or c-di-AMP  
344 signaling. Both pathways are possibly interlinked, as the diadenylate cyclase DisA is part of the  
345 general stress regulon of SigB<sup>67</sup>. Our hypothesis that the plant metabolites actively trigger the  
346 general stress response via altering c-di-AMP signaling is supported by our finding that plant  
347 secretions can compensate for the loss of the diadenylate cyclase CdaA by inducing DisA (in  
348 ancestors) and CdaS (in descendants). Furthermore, descendants of secretion-treated  $\Delta sigB$   
349 bacteria do not respond to NaCl in contrast with the WT parental strain (Fig. 5), indicating that  
350 the general stress response is required to guarantee the long-term effects on descendants of  
351 bacteria that interacted with the root. Indeed, both ancestors and descendants of bacteria that  
352 interact with root secretions become more tolerant to biotic stress, represented by salicylic acid,  
353 and abiotic stress represented by high salinity (Fig. 2). These simple experiments and the  
354 surrounding analysis and framework demonstrate what could be the beginning of a larger  
355 multigenerational transcription rewiring program, and indicate that bacterial memory in cellular  
356 behaviors may be a rich area for further exploration.

357 Consistent with the established role of Spo0A in plant colonization, *spo0A* deletion manifested a  
358 prolonged lag time as compared with WT bacteria and their descendants. In addition, we found  
359 an aberrant response to plant secretions in *perR* knockout (Fig. 5). Taken together, these results

360 support the notion that plant-derived compounds act upstream of SigB and Spo0A, by  
361 modulating c-di-AMP signaling (Fig. 6G).

362 Admittedly, we do not know yet what plant signal(s) are responsible for the observed pattern of  
363 multigenerational information storage. Furthermore, metabolites produced by the root (e.g  
364 salicylic acid, sucrose, malic acid and jasmonic acid) that were previously reported to induce  
365 microbial responses did no mimic the long-term effects of plant secretions (Fig. S12). It is  
366 possible that a combination of several metabolites is required in order to induce the effect we  
367 observe in the bacteria following secretion treatment. Encouragingly, a mutant for oxylipins  
368 synthesis demonstrated a failure to shorten the lag phase and to induce a reporter for bacillaene  
369 synthesis, which is associated with both short-term and long-term effects of the plants (Fig. 6).  
370 As neither carbon or nitrogen mimicked the effects of the plant (Figs S2 and S4), collectively  
371 these results support a highly specific regulation by plant metabolites.

372 In conclusion, our results suggest that *B. subtilis* adapts rapidly to the interaction with *A. thaliana*,  
373 and that this adaptation includes unexpected multigenerational transcriptome rewiring and  
374 increased fitness. Our findings are relevant for the application of *B. subtilis* as a PGPR in  
375 agriculture, as they imply that simple pre-exposure of the inoculated strains to the root might be  
376 a stable strategy for root colonization and improved stress tolerance of the applied strains (Fig.  
377 6H). Moreover, an increased multigenerational fitness following an exposure to a host cue could  
378 be also applicable to *Bacillus* strains acting as mammalian probiotics.

379

380

## 381 **Materials and methods**

### 382 **Strains and media**

383 All bacterial strains used in this study appear in table S1. Transformation of gene knockouts  
384 from strains 168 or PY79 into strain 3610 was done with the following protocol: DNA was  
385 extracted from strain 168 or PY79 with the DNeasy Blood & Tissue kit (Qiagen) as described in  
386 the manufacturer's protocol and the final DNA yield was quantified by Qubit (Life  
387 Technologies). The DNA was introduced by transformation into strain 3610 by natural  
388 competence, and strains were confirmed by PCR for successful transformation. The strains were  
389 grown in LB broth (Difco), or MSgg medium (5 mM potassium phosphate, 100 mM MOPS (pH

390 7), 2 mM MgCl<sub>2</sub>, 50 μM MnCl<sub>2</sub>, 50 μM FeCl<sub>3</sub>, 700 μM CaCl<sub>2</sub>, 1 μM ZnCl<sub>2</sub>, 2 μM thiamine,  
391 0.5% glycerol, 0.5% glutamate, 50 μg/mL threonine, tryptophan and phenylalanine). Solid LB  
392 medium contained 1.5% bacto agar (Difco) (Maan & Gilhar et al., 2021).

393

#### 394 **Determination of cell density**

395 For culture density, OD<sub>600</sub> was measured with a spectrophotometer (Ultrospec 2100,  
396 Amersham Biosciences).

397

#### 398 **Plant strains and growth conditions**

399 Seeds of *A. thaliana* Col-0 and *Lycopersicon esculentum* (tomato, cultivar moneymaker) were  
400 surface-sterilized and seeded on Petri dishes containing Murashige and Skoog medium (4.4 g/L),  
401 PH 5.7, supplied with 0.5% (w/v) plant agar (Duchefa), 0.5% Sucrose (SigmaAldrich) and then  
402 stratified at 4°C for two days (Golani et al., 2013). The seeds were further transferred to a  
403 growth chamber (MRC) at 23°C in a 12 h light/12 h dark regime (Maan & Gilhar et al., 2021).  
404 All *A. thaliana* mutant lines were in the Col-0 background and were kindly provided by Asaph  
405 Aharoni's lab, Department of plant and environmental sciences, Weizmann institute of science.

406

#### 407 **Extraction of plant secretions**

408 10-day-old seedlings were washed in PBS (Biological Industries), transferred to 6 ml liquid MSgg  
409 medium of each well of a 6-well microplate (Thermo Scientific), and then grown for additional  
410 four days. Eight seedlings were put in each well. The liquid medium was then collected and  
411 filtered with a 0.22 μm filter.

412

#### 413 **Bacterial culture with and without plant secretions**

414 *B. subtilis* cells were grown from a single colony isolated over LB plates to a mid - logarithmic  
415 growth phase (4 hours at 37°C with shaking). The cells were washed in PBS and cultured at OD  
416 of 0.1 in a 24-well plate containing liquid MSgg ("untreated") or plant secretions for 4 hours.

417

## 418 **Growth measurements**

419 Bacterial cells, treated or untreated with plant secretions, were centrifuged and washed three  
420 times in PBS. The bacteria were then seeded at an OD of 0.01 in 200  $\mu$ l liquid MSgg medium of  
421 each well of a 96-well microplate (Thermo Scientific) in the presence or absence of 600 mM  
422 NaCl. The cells were grown with agitation at 30°C for 30 hours in a microplate reader (Infinite  
423 M Plex; Tecan, Austria, or Synergy 2; BioTek, Winooski, VT, USA), and the optical density at  
424 600 nm (OD<sub>600</sub>) was measured every 30 min.

425

## 426 **Luminescence experiments**

427 Luminescence reporter was grown in either MSgg medium or MSgg medium containing plant  
428 secretions. Experiments were carried out using a flat bottom 96-well plate with opaque white  
429 walls (Corning). Measurements were performed every 30 min at 30°C for 30 h, using a  
430 microplate reader (Infinite M Plex; Tecan, Austria, or Synergy 2; BioTek, Winooski, VT, USA).  
431 Luciferase activity was normalized to avoid artifacts related to differential cell numbers as  
432 RLU/OD<sup>42</sup>

433

## 434 **Lag time calculations**

435 The bacterial lag time was calculated with the software GrowthRates 3.0<sup>68</sup>

436

## 437 **Bacterial root colonization measurements**

438 Bacterial cells either treated or untreated with plant secretions were centrifuged, and cell pellets  
439 were washed three times in PBS. The bacteria were then seeded at an OD of 0.02 in 1 ml liquid  
440 MSgg with 7-d-old *A. thaliana* seedlings in a 12-well plate (Thermo Scientific) or in 2 ml liquid  
441 MSgg with 7-d-old tomato seedlings in a 6-well plate (Thermo Scientific). Each well contained  
442 one seedling. After 24h culture, the seedlings were removed from the liquid medium and washed  
443 in PBS. The roots were removed, transferred to a 1.5 Eppendorf tube in 1 ml of 10mM MgCl<sub>2</sub>,  
444 and vortexed for 1 minute. The bacteria were further detached with a sonicator (BRANSON  
445 digital sonifier, Model 250, Microtip) at an amplitude of 10%, pulse 3x 10 seconds.

446

#### 447 **Colony forming units' analysis**

448 To determine the number of live cell counts, cells were serially diluted in PBS, plated on LB  
449 plates, and colony-forming units (CFU) were counted after incubation at 30°C overnight.

450

#### 451 **Flow cytometry**

452 Cells were harvested from plant roots and sonicated using the procedure discussed above. For  
453 flow cytometry analysis, cells were suspended in PBS and measured on a BD LSR II flow  
454 cytometer (BD Biosciences). The GFP and mKate fluorescence were measured using laser  
455 excitation of 488 nm and 561 nm (respectively), coupled with 505 LP and 525/50 sequential  
456 filters. The photomultiplier voltage was set to 484 V. 100,000 cells were counted, and every  
457 sample was analyzed with Diva 8 software (BD Biosciences).

#### 458 **Confocal microscopy**

459 Plants were cultured with secretion treated and untreated bacteria for 24 hours as described in  
460 the “bacterial root colonization measurements” section above. The plant roots were then  
461 washed in PBS and mounted on a microscope slide, and covered with a poly-L-Lysine 31  
462 (Sigma)-treated coverslip. Cells were visualized and photographed using a laser scanning  
463 confocal microscope (Zeiss LSM 780) equipped with a high-resolution microscopy Axiocam  
464 camera. Data were captured using Zen black software (Zeiss, Oberkochen, Germany) (Maan  
465 & Gilhar et al., 2021).

466

#### 467 **RNA extraction**

468 For RNA extraction, cells were treated with 250 µl 20g/L lysozyme for 20 minutes at 30°C.  
469 RNA extraction was done with TRIzol™ reagent (Invitrogen™ according to the  
470 manufacturer's protocol. Briefly, 1 ml of TRIzol reagent was added, and cells were incubated at  
471 room temperature until phase separation. Then 0.2 ml of chloroform was added. The sample  
472 was centrifuged for 15 minutes at 12,000 RCF at 4°C. The aqueous phase containing the RNA  
473 was transferred to a new tube. 0.5 ml of isopropanol was added, and the samples were incubated  
474 for 10 minutes. Samples were centrifuged for 10 minutes at 12,000 RCF g at 4°C and the pellet  
475 was kept and washed in 1 ml of 75% ethanol. The samples were vortexed briefly and then



476 centrifuged for 5 minutes at 7500 RCF at 4°C. The supernatant was discarded, and sample  
477 quality was analyzed by Agilent™ TapeStation™ and NanoDrop™ 2000.

478

#### 479 **DNase treatment**

480 TURBO DNA-free (Ambion) kit was used to remove DNA contamination, as manufacturer's  
481 protocol. Total RNA (5µg) of each sample was digested with 1 µl DNase at 37°C for 30  
482 minutes. Next, 0.1 of the total volume of DNase Inactivation Reagent was added, and samples  
483 were incubated for 5 minutes at room temperature. The samples were centrifuged at 10,000 RCF  
484 for 1.5 minutes, and the supernatant was kept at 4°C.

485

#### 486 **rRNA depletion**

487 Ribo-Zero rRNA Removal bacterial Kit (Illumina) was used to deplete the ribosomal rRNA  
488 from all samples as described in the manufacturer's protocol. The magnetic beads were washed  
489 as described in the protocol. The probes were hybridized into the sample, and later removed  
490 with the magnetic beads according to the protocol. Ethanol precipitation was used to clean up  
491 the depleted RNA. After the process, the sample RNA concentration was measured with  
492 Qubit® 3.0 Fluorimeter.

493

#### 494 **Transcriptome sequencing**

495 The preparation of the libraries and sequencing were performed by the G-INCPM unit at the  
496 Weizmann Institute of Science. Libraries were prepared with G-INCPM mRNA-Seq protocol  
497 without polyA capture. Sequencing was performed by HiSeq Illumina Sequencer using high  
498 output mode. Read type was NextSeq 75 cycles single pair with 200 x 106 reads. Since we had 15  
499 samples in the lane, we expected to have around 1 x 106 reads per sample.

500

#### 501 **RNA-Seq data analysis**

502 Fastq reads were trimmed from their adapter with cutadapt and aligned to the *B. subtilis* genome  
503 (subsp. *subtilis* str. NCIB 3610, NZ\_CM000488.1) with Bowtie 2 version 2.3.4.1 (1). The

504 number of uniquely mapped reads per gene was calculated with HTSeq (2). Normalization and  
505 testing for differential expression were performed with DESeq2 version 1.16. Genes with  
506 normalized mean read  $\geq 50$ , fold change  $\geq 2$ , and adjusted  $P < 0.05$  were considered as  
507 differentially expressed. DAVID (Database for Annotation, Visualization, and Integrated  
508 Discovery) (3-4) was used to perform gene annotation enrichment analysis.

509

## 510 **Statistical methods**

511 All studies were performed in technical triplicates with three separate and independent times.  
512 Statistic analysis is provided in the legend of each figures. Data is expressed as average values  $\pm$   
513 standard deviations of the means. Data was analyzed by two tailed student's t-test ( $\alpha = 0.05$ )  
514 unless indicated otherwise.

515

## 516 **References**

- 517 1 Arnaouteli, S., Bamford, N. C., Stanley-Wall, N. R. & Kovacs, A. T. Bacillus subtilis biofilm formation  
518 and social interactions. *Nat Rev Microbiol*, doi:10.1038/s41579-021-00540-9 (2021).
- 519 2 Hou, Q. & Kolodkin-Gal, I. Harvesting the complex pathways of antibiotic production and resistance  
520 of soil bacilli for optimizing plant microbiome. *FEMS Microbiol Ecol*, doi:10.1093/femsec/fiaa142  
521 (2020).
- 522 3 Suissa, R. *et al.* Molecular genetics for probiotic engineering: dissecting lactic acid bacteria. *Trends*  
523 *Microbiol*, doi:10.1016/j.tim.2021.07.007 (2021).
- 524 4 Emmert, E. A. & Handelsman, J. Biocontrol of plant disease: a (gram-) positive perspective. *FEMS*  
525 *microbiology letters* **171**, 1-9 (1999).
- 526 5 Ongena, M. & Jacques, P. Bacillus lipopeptides: versatile weapons for plant disease biocontrol.  
527 *Trends in microbiology* **16**, 115-125, doi:10.1016/j.tim.2007.12.009 (2008).
- 528 6 Lee, N. K., Kim, W. S. & Paik, H. D. Bacillus strains as human probiotics: characterization, safety,  
529 microbiome, and probiotic carrier. *Food Sci Biotechnol* **28**, 1297-1305, doi:10.1007/s10068-019-  
530 00691-9 (2019).
- 531 7 Rudrappa, T. *et al.* The rhizobacterial elicitor acetoin induces systemic resistance in Arabidopsis  
532 thaliana. *Commun Integr Biol* **3**, 130-138, doi:10.4161/cib.3.2.10584 (2010).
- 533 8 Raaijmakers, J. M., De Bruijn, I., Nybroe, O. & Ongena, M. Natural functions of lipopeptides from  
534 Bacillus and Pseudomonas: more than surfactants and antibiotics. *FEMS microbiology reviews* **34**,  
535 1037-1062, doi:10.1111/j.1574-6976.2010.00221.x (2010).
- 536 9 Nagorska, K., Bikowski, M. & Obuchowski, M. Multicellular behaviour and production of a wide  
537 variety of toxic substances support usage of Bacillus subtilis as a powerful biocontrol agent. *Acta*  
538 *Biochim Pol* **54**, 495-508 (2007).
- 539 10 Kumar, A. S. *et al.* Rhizobacteria Bacillus subtilis restricts foliar pathogen entry through stomata.  
540 *Plant Journal* **72**, 694-706, doi:DOI 10.1111/j.1365-313X.2012.05116.x (2012).

- 541 11 Ogran, A. *et al.* The plant host induces antibiotic production to select the most beneficial colonizers.  
542 *Appl Environ Microbiol*, doi:10.1128/AEM.00512-19 (2019).
- 543 12 Kloepper, J. W., Ryu, C. M. & Zhang, S. Induced Systemic Resistance and Promotion of Plant Growth  
544 by *Bacillus* spp. *Phytopathology* **94**, 1259-1266, doi:10.1094/PHYTO.2004.94.11.1259 (2004).
- 545 13 Bais, H. P., Fall, R. & Vivanco, J. M. Biocontrol of *Bacillus subtilis* against infection of *Arabidopsis*  
546 roots by *Pseudomonas syringae* is facilitated by biofilm formation and surfactin production. *Plant*  
547 *Physiol* **134**, 307-319, doi:10.1104/pp.103.028712 (2004).
- 548 14 Chen, Y. *et al.* A *Bacillus subtilis* sensor kinase involved in triggering biofilm formation on the roots of  
549 tomato plants. *Mol Microbiol* **85**, 418-430, doi:10.1111/j.1365-2958.2012.08109.x (2012).
- 550 15 Beauregard, P. B., Chai, Y., Vlamakis, H., Losick, R. & Kolter, R. *Bacillus subtilis* biofilm induction by  
551 plant polysaccharides. *Proc Natl Acad Sci U S A* **110**, E1621-1630, doi:10.1073/pnas.1218984110  
552 (2013).
- 553 16 Allard-Massicotte, R. *et al.* *Bacillus subtilis* Early Colonization of *Arabidopsis thaliana* Roots Involves  
554 Multiple Chemotaxis Receptors. *mBio* **7**, doi:10.1128/mBio.01664-16 (2016).
- 555 17 Tian, T. *et al.* Sucrose triggers a novel signaling cascade promoting *Bacillus subtilis* rhizosphere  
556 colonization. *ISME J*, doi:10.1038/s41396-021-00966-2 (2021).
- 557 18 Blake, C., Christensen, M. N., Maróti, G. & Kovács, Á. T. Diversification of *B. subtilis*  
558 during experimental evolution on *A. thaliana* leads to synergism in root colonization of  
559 evolved subpopulations. *bioRxiv*, 2021.2003.2006.434191, doi:10.1101/2021.03.06.434191 (2021).
- 560 19 Molle, V. *et al.* The Spo0A regulon of *Bacillus subtilis*. *Mol Microbiol* **50**, 1683-1701 (2003).
- 561 20 Fujita, M., Gonzalez-Pastor, J. E. & Losick, R. High- and low-threshold genes in the Spo0A regulon of  
562 *Bacillus subtilis*. *J Bacteriol* **187**, 1357-1368, doi:10.1128/JB.187.4.1357-1368.2005 (2005).
- 563 21 Barak, I., Ricca, E. & Cutting, S. M. From fundamental studies of sporulation to applied spore  
564 research. *Mol Microbiol* **55**, 330-338, doi:10.1111/j.1365-2958.2004.04445.x (2005).
- 565 22 Andersson, S. G. Stress management strategies in single bacterial cells. *Proc Natl Acad Sci U S A* **113**,  
566 3921-3923, doi:10.1073/pnas.1603151113 (2016).
- 567 23 Lambert, G. & Kussell, E. Memory and fitness optimization of bacteria under fluctuating  
568 environments. *PLoS Genet* **10**, e1004556, doi:10.1371/journal.pgen.1004556 (2014).
- 569 24 Lee, C. K. *et al.* Multigenerational memory and adaptive adhesion in early bacterial biofilm  
570 communities. *Proc Natl Acad Sci U S A* **115**, 4471-4476, doi:10.1073/pnas.1720071115 (2018).
- 571 25 Blake, C., Nordgaard, M., Maroti, G. & Kovacs, A. T. Diversification of *Bacillus subtilis* during  
572 experimental evolution on *Arabidopsis thaliana* and the complementarity in root colonization of  
573 evolved subpopulations. *Environ Microbiol* **23**, 6122-6136, doi:10.1111/1462-2920.15680 (2021).
- 574 26 Radhakrishnan, R. & Baek, K. H. Physiological and biochemical perspectives of non-salt tolerant  
575 plants during bacterial interaction against soil salinity. *Plant Physiol Biochem* **116**, 116-126,  
576 doi:10.1016/j.plaphy.2017.05.009 (2017).
- 577 27 Hibbing, M. E., Fuqua, C., Parsek, M. R. & Peterson, S. B. Bacterial competition: surviving and thriving  
578 in the microbial jungle. *Nat Rev Microbiol* **8**, 15-25, doi:10.1038/nrmicro2259 (2010).
- 579 28 Maan, H., Gilhar, O., Porat, Z. & Kolodkin-Gal, I. *Bacillus subtilis* Colonization of *Arabidopsis thaliana*  
580 Roots Induces Multiple Biosynthetic Clusters for Antibiotic Production. *Frontiers in Cellular and*  
581 *Infection Microbiology* **11**, doi:10.3389/fcimb.2021.722778 (2021).
- 582 29 Fahmi, T., Port, G. C. & Cho, K. H. c-di-AMP: An Essential Molecule in the Signaling Pathways that  
583 Regulate the Viability and Virulence of Gram-Positive Bacteria. *Genes-Basel* **8**, doi:ARTN 197  
584 10.3390/genes8080197 (2017).

- 585 30 Townsley, L., Yannarell, S. M., Huynh, T. N., Woodward, J. J. & Shank, E. A. Cyclic di-AMP Acts as an  
586 Extracellular Signal That Impacts *Bacillus subtilis* Biofilm Formation and Plant Attachment. *mBio* **9**,  
587 doi:10.1128/mBio.00341-18 (2018).
- 588 31 Commichau, F. M., Heidemann, J. L., Ficner, R. & Stulke, J. Making and Breaking of an Essential  
589 Poison: the Cyclases and Phosphodiesterases That Produce and Degrade the Essential Second  
590 Messenger Cyclic di-AMP in Bacteria. *J Bacteriol* **201**, doi:10.1128/JB.00462-18 (2019).
- 591 32 Mehne, F. M. *et al.* Cyclic di-AMP homeostasis in *Bacillus subtilis*: both lack and high level  
592 accumulation of the nucleotide are detrimental for cell growth. *J Biol Chem* **288**, 2004-2017,  
593 doi:10.1074/jbc.M112.395491 (2013).
- 594 33 Corrigan, R. M. & Grundling, A. Cyclic di-AMP: another second messenger enters the fray. *Nature*  
595 *Reviews Microbiology* **11**, 513-524, doi:10.1038/nrmicro3069 (2013).
- 596 34 Gandara, C. & Alonso, J. C. DisA and c-di-AMP act at the intersection between DNA-damage response  
597 and stress homeostasis in exponentially growing *Bacillus subtilis* cells. *DNA Repair (Amst)* **27**, 1-8,  
598 doi:10.1016/j.dnarep.2014.12.007 (2015).
- 599 35 Fahmi, T., Port, G. C. & Cho, K. H. c-di-AMP: An Essential Molecule in the Signaling Pathways that  
600 Regulate the Viability and Virulence of Gram-Positive Bacteria. *Genes (Basel)* **8**,  
601 doi:10.3390/genes8080197 (2017).
- 602 36 Commichau, F. M., Gibhardt, J., Halbedel, S., Gundlach, J. & Stulke, J. A Delicate Connection: c-di-  
603 AMP Affects Cell Integrity by Controlling Osmolyte Transport. *Trends Microbiol* **26**, 175-185,  
604 doi:10.1016/j.tim.2017.09.003 (2018).
- 605 37 Gundlach, J. *et al.* Sustained sensing in potassium homeostasis: Cyclic di-AMP controls potassium  
606 uptake by KimA at the levels of expression and activity. *J Biol Chem* **294**, 9605-9614,  
607 doi:10.1074/jbc.RA119.008774 (2019).
- 608 38 Pane-Farre, J., Quin, M. B., Lewis, R. J. & Marles-Wright, J. Structure and Function of the Stressosome  
609 Signalling Hub. *Subcell Biochem* **83**, 1-41, doi:10.1007/978-3-319-46503-6\_1 (2017).
- 610 39 Mendez, M. B., Orsaria, L. M., Philippe, V., Pedrido, M. E. & Grau, R. R. Novel roles of the master  
611 transcription factors Spo0A and sigmaB for survival and sporulation of *Bacillus subtilis* at low growth  
612 temperature. *J Bacteriol* **186**, 989-1000, doi:10.1128/JB.186.4.989-1000.2004 (2004).
- 613 40 Helmann, J. D. *et al.* The global transcriptional response of *Bacillus subtilis* to peroxide stress is  
614 coordinated by three transcription factors. *Journal of Bacteriology* **185**, 243-253,  
615 doi:10.1128/Jb.185.1.243-253.2003 (2003).
- 616 41 Ogran, A. *et al.* The Plant Host Induces Antibiotic Production To Select the Most-Beneficial  
617 Colonizers. *Appl Environ Microbiol* **85**, doi:10.1128/AEM.00512-19 (2019).
- 618 42 Maan, H., Gilhar, O., Porat, Z. & Kolodkin-Gal, I. *Bacillus subtilis* Colonization of *Arabidopsis thaliana*  
619 Roots Induces Multiple Biosynthetic Clusters for Antibiotic Production. *Front Cell Infect Microbiol* **11**,  
620 722778, doi:10.3389/fcimb.2021.722778 (2021).
- 621 43 Duy, N. V. *et al.* The proteome and transcriptome analysis of *Bacillus subtilis* in response to salicylic  
622 acid. *Proteomics* **7**, 698-710, doi:10.1002/pmic.200600706 (2007).
- 623 44 Bakker, P. A., Berendsen, R. L., Doornbos, R. F., Wintermans, P. C. & Pieterse, C. M. The rhizosphere  
624 revisited: root microbiomics. *Front Plant Sci* **4**, 165, doi:10.3389/fpls.2013.00165 (2013).
- 625 45 Rekha, K., Baskar, B., Srinath, S. & Usha, B. Plant-growth-promoting rhizobacteria *Bacillus subtilis*  
626 RR4 isolated from rice rhizosphere induces malic acid biosynthesis in rice roots. *Can J Microbiol* **64**,  
627 20-27, doi:10.1139/cjm-2017-0409 (2018).
- 628 46 Rohdich, F. *et al.* Cytidine 5'-triphosphate-dependent biosynthesis of isoprenoids: YgbP protein of  
629 *Escherichia coli* catalyzes the formation of 4-diphosphocytidyl-2-C-methylerythritol. *Proc Natl Acad*  
630 *Sci U S A* **96**, 11758-11763, doi:10.1073/pnas.96.21.11758 (1999).

- 631 47 Sprenger, G. A. *et al.* Identification of a thiamin-dependent synthase in *Escherichia coli* required for  
632 the formation of the 1-deoxy-D-xylulose 5-phosphate precursor to isoprenoids, thiamin, and  
633 pyridoxol. *Proc Natl Acad Sci U S A* **94**, 12857-12862, doi:10.1073/pnas.94.24.12857 (1997).
- 634 48 Bagchi, R. *et al.* The Arabidopsis ALF4 protein is a regulator of SCF E3 ligases. *EMBO J* **37**, 255-268,  
635 doi:10.15252/emboj.201797159 (2018).
- 636 49 Sugimoto, K., Allmann, S. & Kolomiets, M. V. Editorial: Oxylipins: The Front Line of Plant Interactions.  
637 *Front Plant Sci* **13**, 878765, doi:10.3389/fpls.2022.878765 (2022).
- 638 50 Maan, H., Itkin, M., Malitsky, S., Friedman, J. & Kolodkin-Gal, I. Resolving the conflict between  
639 antibiotic production and rapid growth by recognition of peptidoglycan of susceptible competitors.  
640 *Nature Communications* **13**, 431, doi:10.1038/s41467-021-27904-2 (2022).
- 641 51 Hou, Q. & Kolodkin-Gal, I. Harvesting the complex pathways of antibiotic production and resistance  
642 of soil bacilli for optimizing plant microbiome. *FEMS Microbiol Ecol* **96**, doi:10.1093/femsec/fiaa142  
643 (2020).
- 644 52 Kolodkin-Gal, I. *et al.* Respiration control of multicellularity in *Bacillus subtilis* by a complex of the  
645 cytochrome chain with a membrane-embedded histidine kinase. *Genes Dev* **27**, 887-899,  
646 doi:10.1101/gad.215244.113 (2013).
- 647 53 McLoon, A. L., Guttenplan, S. B., Kearns, D. B., Kolter, R. & Losick, R. Tracing the domestication of a  
648 biofilm-forming bacterium. *J Bacteriol* **193**, 2027-2034, doi:10.1128/JB.01542-10 (2011).
- 649 54 Liu, J. *et al.* Metabolic co-dependence gives rise to collective oscillations within biofilms. *Nature* **523**,  
650 550-554, doi:10.1038/nature14660 (2015).
- 651 55 Yona, A. H. *et al.* tRNA genes rapidly change in evolution to meet novel translational demands. *eLife*  
652 **2**, e01339, doi:10.7554/eLife.01339 (2013).
- 653 56 Lopez, D., Vlamakis, H., Losick, R. & Kolter, R. Cannibalism enhances biofilm development in *Bacillus*  
654 *subtilis*. *Mol Microbiol* **74**, 609-618, doi:10.1111/j.1365-2958.2009.06882.x (2009).
- 655 57 Bucher, T., Oppenheimer-Shaanan, Y., Savidor, A., Bloom-Ackermann, Z. & Kolodkin-Gal, I.  
656 Disturbance of the bacterial cell wall specifically interferes with biofilm formation. *Environmental*  
657 *microbiology reports*, doi:10.1111/1758-2229.12346 (2015).
- 658 58 Mhatre, E. *et al.* Presence of Calcium Lowers the Expansion of *Bacillus subtilis* Colony Biofilms.  
659 *Microorganisms* **5**, doi:10.3390/microorganisms5010007 (2017).
- 660 59 Oppenheimer-Shaanan, Y. *et al.* Spatio-temporal assembly of functional mineral scaffolds within  
661 microbial biofilms. *Npj Biofilms And Microbiomes* **2**, 15031, doi:10.1038/npjbiofilms.2015.31  
662 <http://www.nature.com/articles/npjbiofilms201531#supplementary-information> (2016).
- 663 60 Rubinstein, S. M. *et al.* Osmotic pressure can regulate matrix gene expression in *Bacillus subtilis*. *Mol*  
664 *Microbiol* **86**, 426-436, doi:10.1111/j.1365-2958.2012.08201.x (2012).
- 665 61 Cairns, L. S., Marlow, V. L., Bissett, E., Ostrowski, A. & Stanley-Wall, N. R. A mechanical signal  
666 transmitted by the flagellum controls signalling in *Bacillus subtilis*. *Mol Microbiol* **90**, 6-21,  
667 doi:10.1111/mmi.12342 (2013).
- 668 62 Asally, M. *et al.* Localized cell death focuses mechanical forces during 3D patterning in a biofilm. *Proc*  
669 *Natl Acad Sci U S A* **109**, 18891-18896, doi:10.1073/pnas.1212429109 (2012).
- 670 63 Grau, R. R. *et al.* A Duo of Potassium-Responsive Histidine Kinases Govern the Multicellular Destiny  
671 of *Bacillus subtilis*. *mBio* **6**, e00581, doi:10.1128/mBio.00581-15 (2015).
- 672 64 Rudrappa, T., Czymmek, K. J., Pare, P. W. & Bais, H. P. Root-secreted malic acid recruits beneficial soil  
673 bacteria. *Plant Physiol* **148**, 1547-1556, doi:10.1104/pp.108.127613 (2008).
- 674 65 Yang, C. Y. *et al.* Encoding Membrane-Potential-Based Memory within a Microbial Community. *Cell*  
675 *Syst* **10**, 417-423 e413, doi:10.1016/j.cels.2020.04.002 (2020).

- 676 66 Ronin, I., Katsowich, N., Rosenshine, I. & Balaban, N. Q. A long-term epigenetic memory switch  
677 controls bacterial virulence bimodality. *Elife* **6**, doi:10.7554/eLife.19599 (2017).
- 678 67 Vohradsky, J. *et al.* Kinetic Modeling and Meta-Analysis of the Bacillus subtilis SigB Regulon during  
679 Spore Germination and Outgrowth. *Microorganisms* **9**, doi:ARTN 112  
680 10.3390/microorganisms9010112 (2021).
- 681 68 Hall, B. G., Acar, H., Nandipati, A. & Barlow, M. Growth rates made easy. *Mol Biol Evol* **31**, 232-238,  
682 doi:10.1093/molbev/mst187 (2014).

683

684

685

686

687

688

## 689 **Legends**

690 Figure 1. ***A. thaliana* secretions grant *B. subtilis* cells increased tolerance to stressors** (A)  
691 *B. subtilis* bacteria were cultured in liquid MSgg (“untreated”) or in *A. thaliana* secretions and then  
692 washed in PBS. These bacteria were termed “ancestors”. Some of the bacteria were transferred  
693 to a shaking culture in liquid LB and grown for four hours. These bacteria were termed  
694 “descendants”. The bacteria were then regrown in MSgg and monitored for planktonic growth -  
695 /+ 600 mM NaCl in a plate reader. Alternatively ancestors and descendants were cultured with  
696 *A. thaliana* plants -/+ 600 mM NaCl, after which root colonization was examined with a  
697 confocal microscope, CFU counts and FACS analysis. (B-C) Growth curves and lag time of  
698 secretion treated and untreated bacteria (+sec and -sec respectively) and their descendants in the  
699 absence and presence of NaCl. Bacteria were grown in a microplate reader as described above  
700 and their lag time was calculated (*see materials and methods*) (D) Lag time of bacteria with and  
701 without plant secretions in the absence and presence of salicylic acid in “ancestor” bacteria. (E)  
702 Growth curves of bacteria that were treated or untreated with secretions, re-streaked separately  
703 on LB plates and grown overnight. Single colonies were picked up, transferred to liquid shaking  
704 culture for 4 hours at 37°C and then grown in a microplate reader as described above. All  
705 experiments were performed in triplicates at least three separate and independent times. Data is  
706 expressed as average values  $\pm$  standard deviations of the means from a representative

707 experiment, performed with replicates. Data was analyzed by two tailed student's t-test ( $\alpha =$   
708 0.05).

709

710 **Figure 2. Multigenerational adaptation of *B. subtilis* to *A. thaliana* enhances root**  
711 **colonization in the presence and absence of abiotic stressor.** *B. subtilis* colonization of *A.*  
712 *thaliana* and tomato roots after 24h with and without secretion treatment (A-B). Secretion-treated  
713 and untreated WT bacteria (+sec and -sec respectively) and their descendants were cultured  
714 separately in liquid MSgg with *A. thaliana* seedlings in the absence or presence of NaCl. After  
715 24h, the bacteria colonizing the roots were quantified with CFU counts. Data is expressed as  
716 average values  $\pm$  standard deviations of the means from all independent experiments.

717

718 **Figure 3. Multigenerational adaptation of *B. subtilis* to *A. thaliana* increases the**  
719 **competitiveness of exposed bacteria and their decedents.** (A) Fluorescently-labeled bacteria  
720 treated or untreated with secretions were cultured together in liquid MSgg with *A. thaliana*  
721 seedlings in the absence or presence of NaCl. The percentage of secretion-treated and untreated  
722 ancestor bacteria on the root was quantified with FACS. Representative bright field and  
723 fluorescent images of secretion-treated and untreated ancestor bacteria on *A. thaliana* roots in  
724 the absence (B) and presence (C) of NaCl. (D) The percentage of secretion-treated versus  
725 untreated bacteria on tomato roots without NaCl quantified with FACS (as described above).  
726 (E) The percentage of secretion-treated versus untreated descendant bacteria on *A. thaliana* roots  
727 without NaCl. Descendant bacteria were grown and treated as described in Fig. 1 and quantified  
728 with FACS (as described above). All experiments were performed in triplicates at least three  
729 separate and independent times. Data is expressed as average values  $\pm$  standard deviations of the  
730 means from representative experiment, done in technical triplicates. Data was analyzed by two  
731 tailed student's t-test ( $\alpha = 0.05$ ).

732

733 **Figure 4. Multigenerational adaptation of *B. subtilis* to *A. thaliana* involves transcriptome**  
734 **rewiring Long-term adaptation of *B. subtilis* to *A. thaliana* involves transcriptome**  
735 **rewiring.** (A) Hierarchical clustering of genes in ancestor and descendant bacteria that were  
736 detected as differentially expressed in the transcriptome experiment. Each treatment includes

737 three replicates.. The data are presented on a Z-score scale. *B. subtilis* in the absence of secretion  
738 treatment (-sec), in the presence of secretions (+sec), and the presence of *A. thaliana* seedlings  
739 (+plant), as well as descendants of secretion treated and untreated bacteria. (B) Principal  
740 component analysis (PCA) of the RNA-Seq data of untreated, secretion treated, and plant  
741 treated ancestor bacteria (“A”) and their descendants (“D”). (C) Venn diagrams of differentially  
742 expressed genes in the samples mentioned above. The number in each circle represents the  
743 amount of differentially expressed genes between the different comparisons and their overlap: –  
744 sec and + sec (red circle), -sec and +plant (blue circle), +sec and +plant (green circle) in  
745 ancestors. In the descendants, the red circle represents the number of differentially expressed  
746 genes out of all the genes (blue circle). (E-F) Volcano plots. The red dots represent differentially  
747 expressed genes between secretion treatment and untreated cells, and the blue dots represent  
748 non-differentially expressed genes in the mentioned gene categories. The other genes are  
749 represented by the light gray dots.

750 **Figure 5. Multigenerational adaptation of *B. subtilis* to *A. thaliana* involves nucleotide**  
751 **signaling, the general stress response and the master regulator Spo0A.**(A-B) Lag time of  
752 WT versus diadenylate cyclase mutant bacteria. WT,  $\Delta cdaA$ ,  $\Delta cdaS$  and  $\Delta disA$  Bacteria were  
753 treated or untreated with plant secretions (+sec and -sec respectively). The bacteria and their  
754 descendants were grown in a microplate reader and their lag time was calculated (See Fig.1). (C-  
755 H) Lag time of secretion-treated or untreated WT,  $\Delta sigB$ ,  $\Delta spo0A$  and  $\Delta perR$  bacteria (C-E) and  
756 their descendants (F-H). The bacteria and their descendants were grown in a microplate reader  
757 in the absence and presence of NaCl and their lag time was calculated (See Fig.1). Data is  
758 expressed as average values  $\pm$  standard deviations of the means from a representative  
759 experiment, performed with triplicates. Data was analyzed by two tailed student’s t-test (alpha =  
760 0.05).

761

762 **Figure 6. Oxylipins support the beneficial effects of *A. thaliana*.**(A-C) Normalized  
763 expression of PpksC-lux and (D-F) growth curves of bacteria grown in the absence or presence  
764 of WT and mutant *A. thaliana* secretions. Data is expressed as average values  $\pm$  standard  
765 deviations of the means from a representative experiment, performed with four technical  
766 repeats. Data was analyzed by two tailed student’s t-test (alpha = 0.05). **(G) A proposed**  
767 **bacterial pathways affected by the plant.** (i) The plant modulates the activity of Spo0A and its



768 kinases, which regulate biofilm formation and antibiotic synthesis. (ii) The plant modulates the  
769 activity of SigB, whose activity is phosphorylation-dependent and involves the stressosome via  
770 one of several putative sensor proteins. SigB, in turn, controls the general stress response. (iii)  
771 The plant modulates the activity of PerR by one of the two scenarios indicated. PerR modulates  
772 the response to peroxide stress and indirectly affects the general stress response.

773 **(H) A scheme showing the benefits of memorization of plant hosts.** Naïve bacteria (grey)  
774 are treated with a plant or its secretions. The treated bacteria (red) then colonize the root more  
775 efficiently than untreated bacteria in a competition setting. The effect of the plant on the  
776 bacterial transcriptome is partially conserved in the descendants of the treated bacteria (pink).  
777 However, they still exhibit a higher efficiency of root colonization, which is comparable to their  
778 ancestors.

779

780

Figure 1 bioRxiv preprint doi: <https://doi.org/10.1101/2022.05.29.493878>; this version posted May 30, 2022. The copyright holder for this preprint (which was not certified by peer review) is the author/funder. All rights reserved. No reuse allowed without permission.

A.

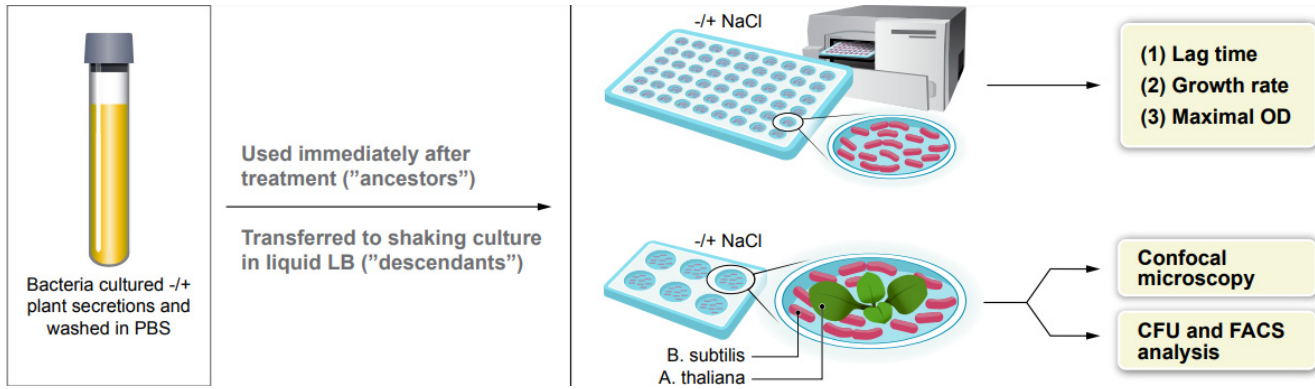

B.

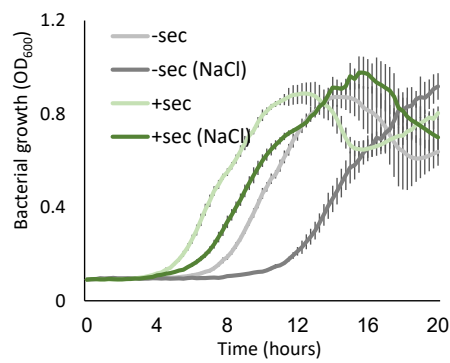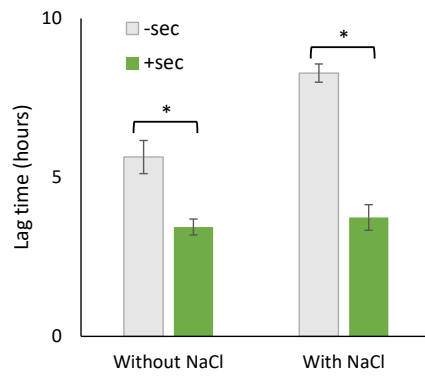

D.

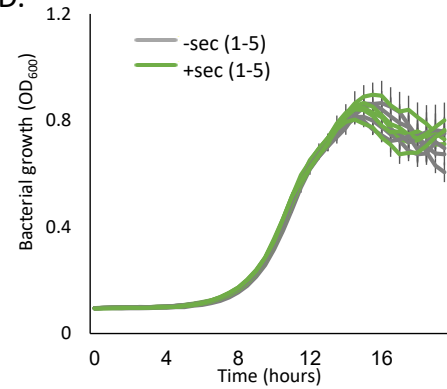

C.

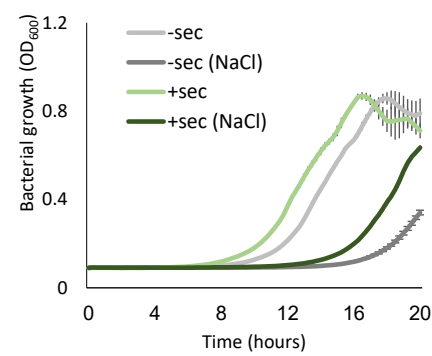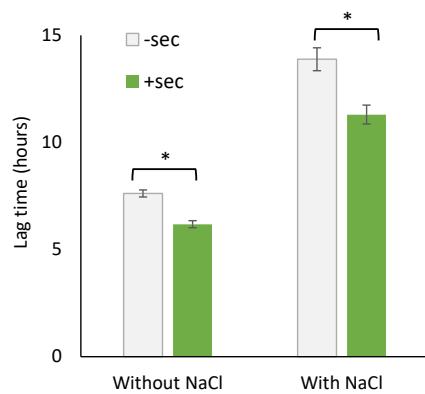

E.

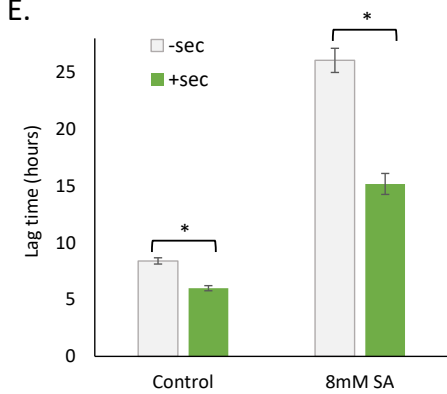

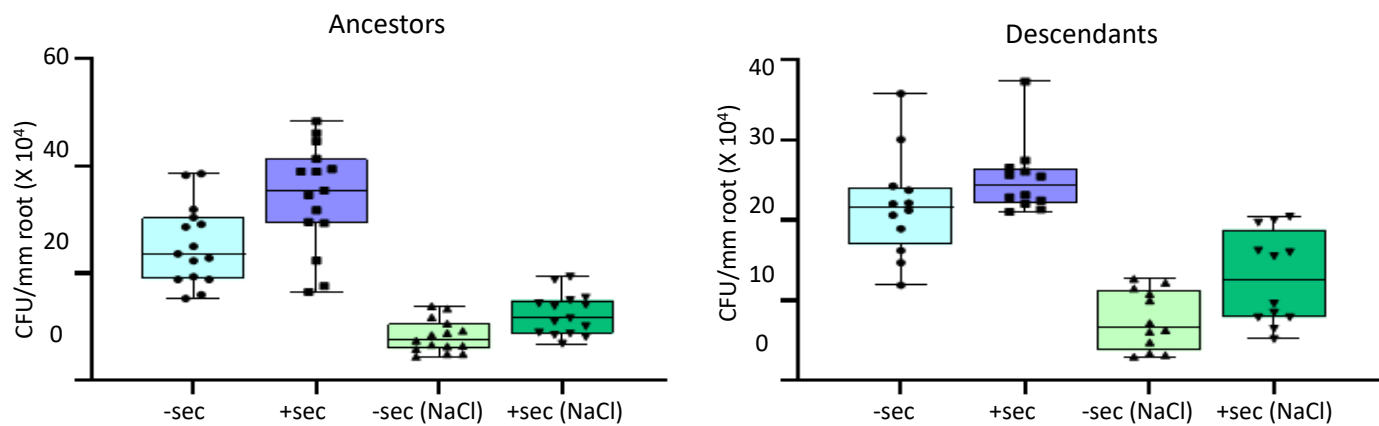

Figure 3.

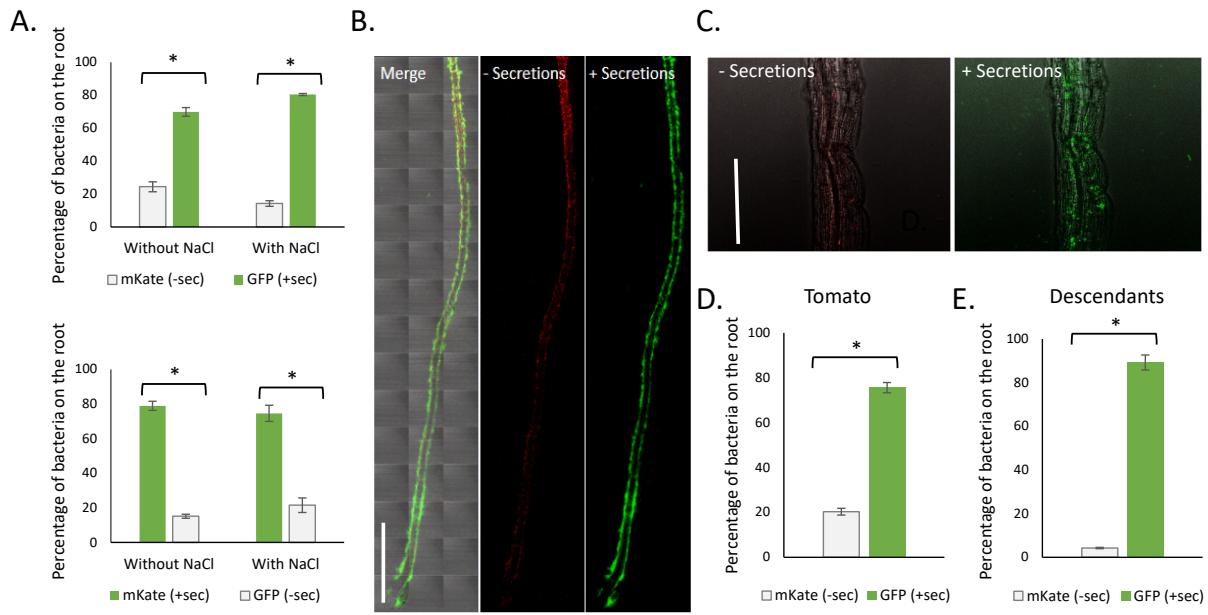

Figure 4. bioRxiv preprint doi: <https://doi.org/10.1101/2022.05.29.493878>; this version posted May 30, 2022. The copyright holder for this preprint (which was not certified by peer review) is the author/funder. All rights reserved. No reuse allowed without permission.

A.

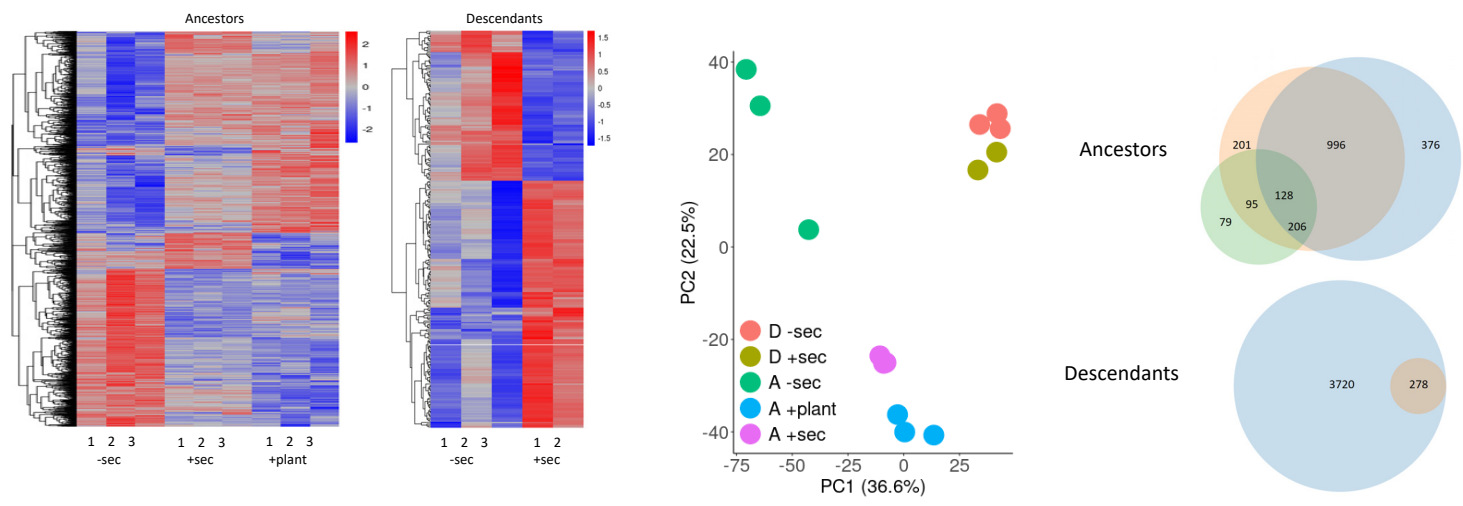

E. Ancestors

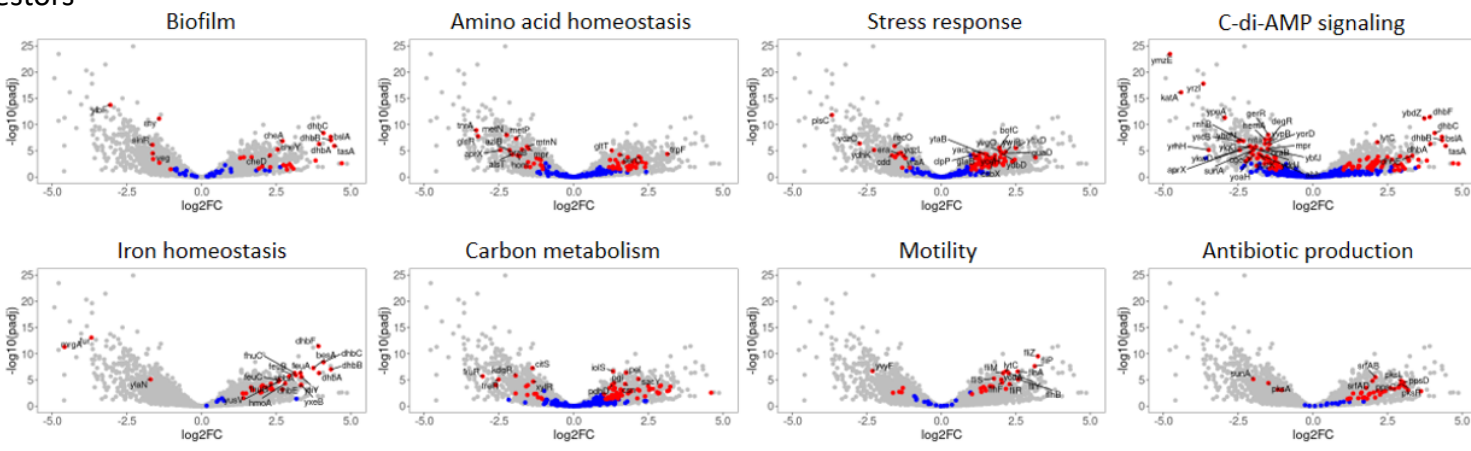

F. Decedents

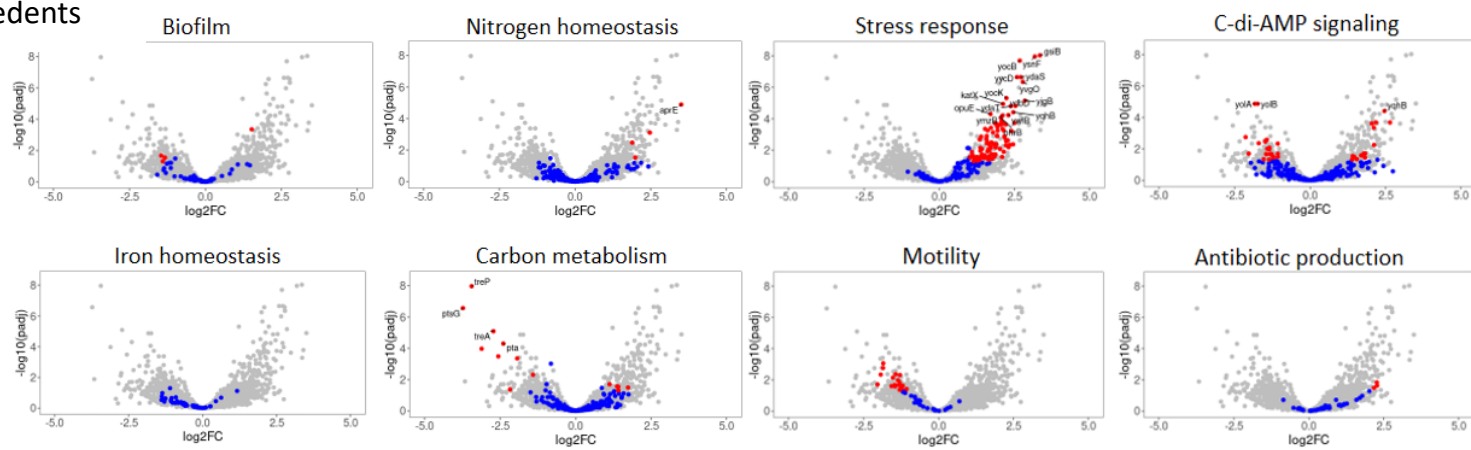

Ancestors

A.

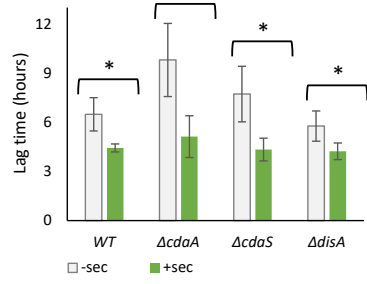

C.

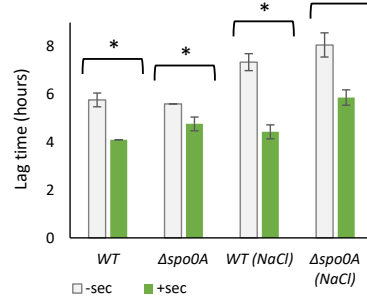

E.

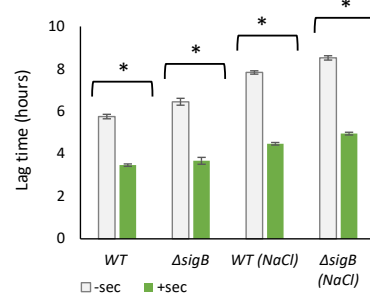

G.

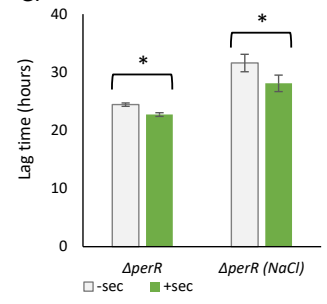

Descendants

B.

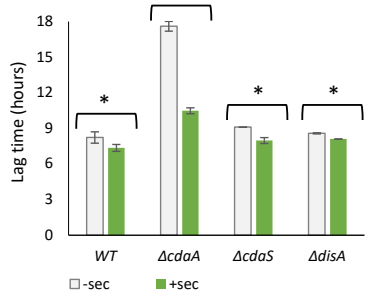

D.

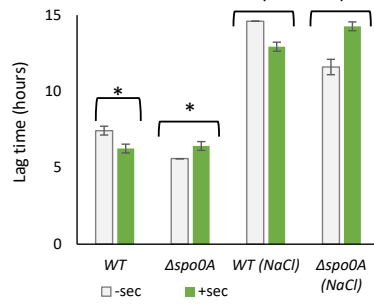

F.

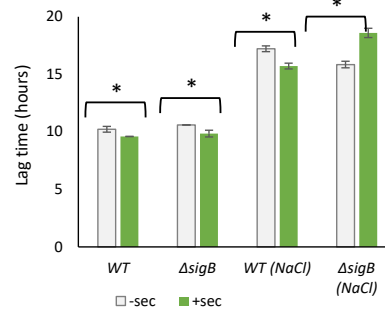

H.

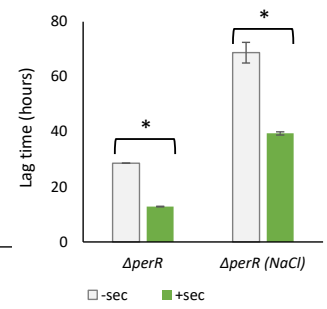

Figure 6. bioRxiv preprint doi: <https://doi.org/10.1101/2022.05.29.493878>; this version posted May 30, 2022. The copyright holder for this preprint (which was not certified by peer review) is the author/funder. All rights reserved. No reuse allowed without permission.

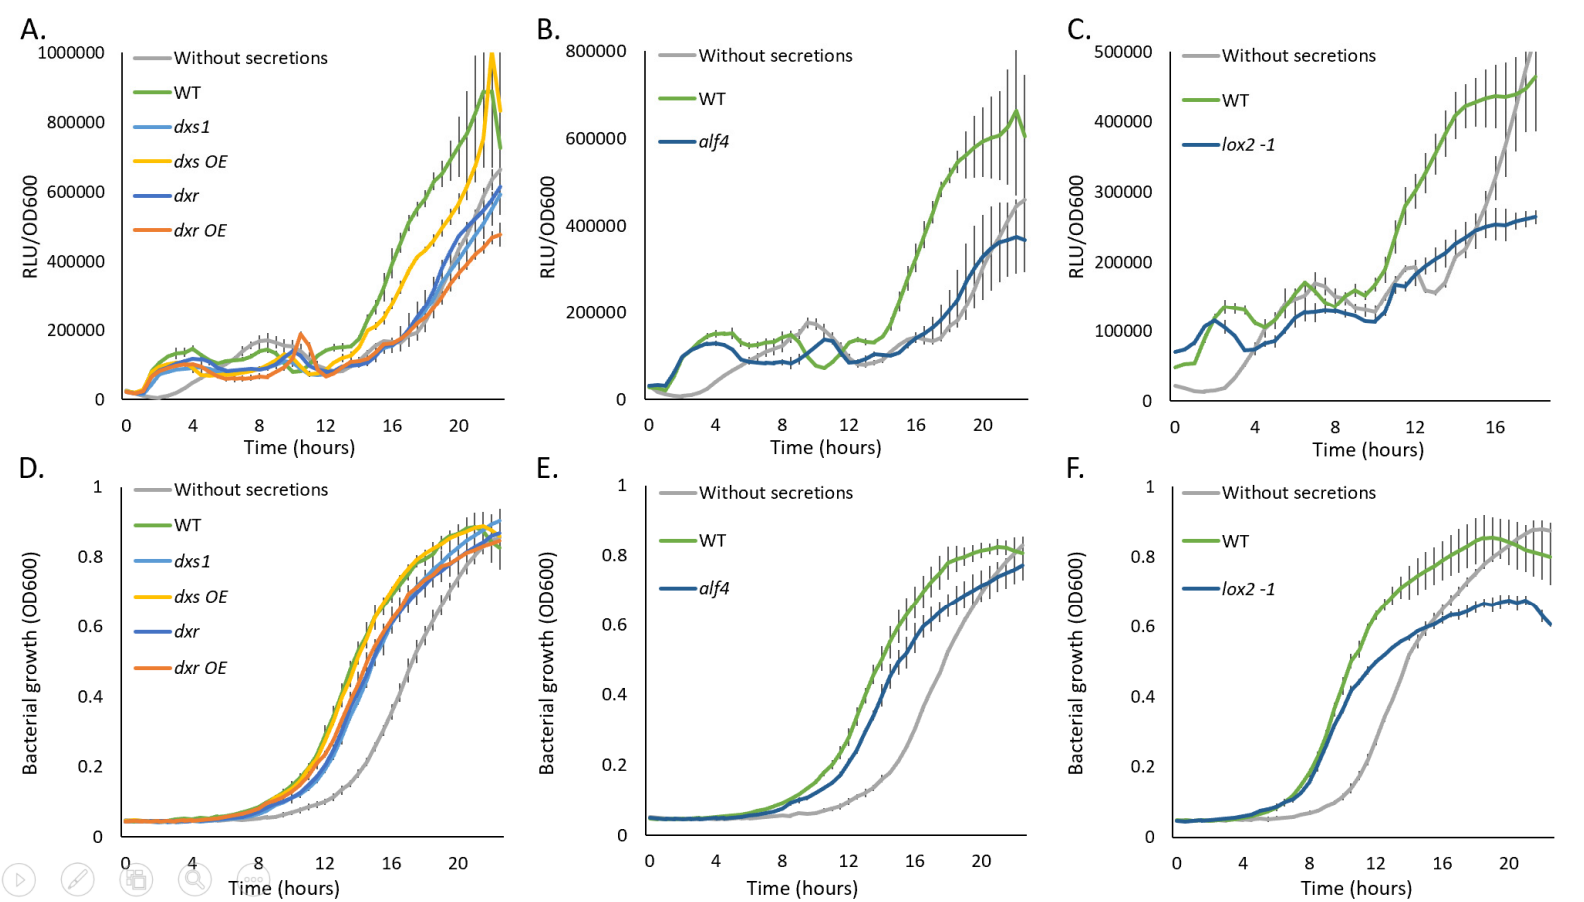

G.

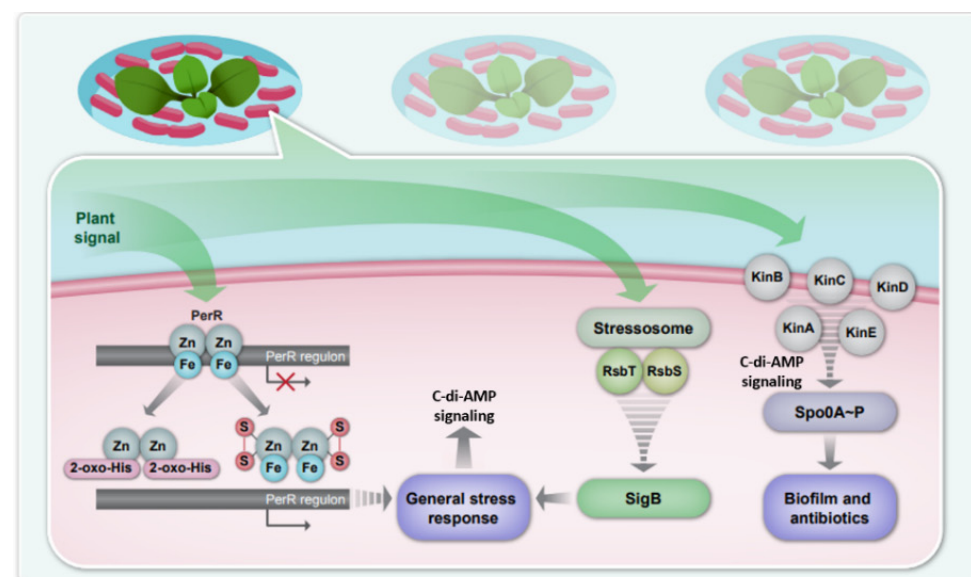

H.

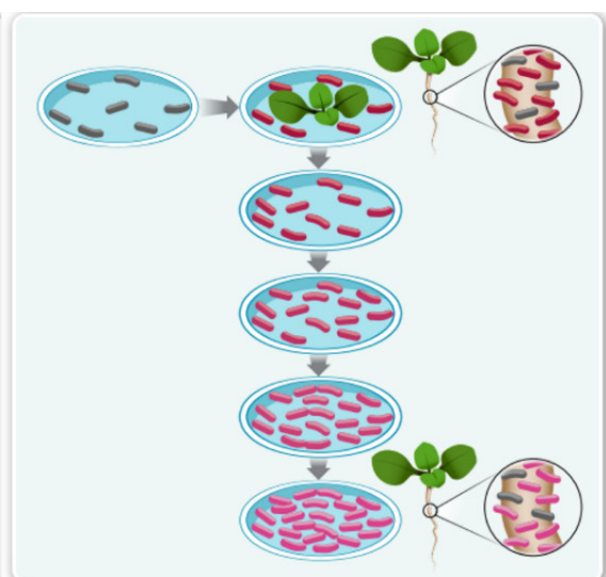

Source: https://www.biorxiv.org/content/10.1101/2022.05.29.493878v1.full.pdf
